# Supplementary material for: Preliminary Results about Lamb Meat Tenderness Based on the Study of Novel Isoforms and Alternative Splicing Regulation Pathways Using Iso-seq, RNA-seq and CTCF ChIP-seq Data
Source: MDPI journal article supplement (doi:10.3390/foods11081068), 2022-04-07
Supplement: s1 [file s1]

**Table S2.** Reads information of single-molecule long-read isoform sequencing (Iso-seq) data in sheep muscle

| Data type                               | Total number | Min length | Max length | Average length |
|-----------------------------------------|--------------|------------|------------|----------------|
| polymerase reads                        | 442,966      | 51         | 363,026    | 97,901         |
| Subreads                                | 26,481,497   | 51         | 191,746    | 1,560          |
| Circular Consensus Sequence (CCS) reads | 331,820      | 55         | 15,574     | 2,119          |
| Full-length Non-Concatemer (FLNC) reads | 247,201      | 50         | 9,144      | 1,732          |
