# Supplementary material for: Preliminary Results about Lamb Meat Tenderness Based on the Study of Novel Isoforms and Alternative Splicing Regulation Pathways Using Iso-seq, RNA-seq and CTCF ChIP-seq Data
Source: MDPI journal article supplement (doi:10.3390/foods11081068), 2022-04-07
Supplement: s1 [file s1]

| Sample  | Raw Reads | Clean Reads | Q30     | mapped Reads | map Rate |
|---------|-----------|-------------|---------|--------------|----------|
| IP_M045 | 40824586  | 40091240    | 94.44 % | 38671219     | 96.46 %  |
| IP_M090 | 65992524  | 64774520    | 93.37 % | 64444293     | 99.49 %  |
| In_M045 | 52698946  | 51761624    | 93.81 % | 51577058     | 99.64 %  |
| In_M090 | 54760180  | 53872826    | 94.31 % | 53735714     | 99.75 %  |
